# Supplementary material for: Generalization of piezoelectric quantum anomalous Hall insulator based on monolayer Fe2I2: a first-principles study
Source: Royal Society of Chemistry journal article supplement (doi:10.1039/d1cp04123a), 2021-01-01
Supplement: d1cp04123a1.pdf [file d1cp04123a1.pdf]

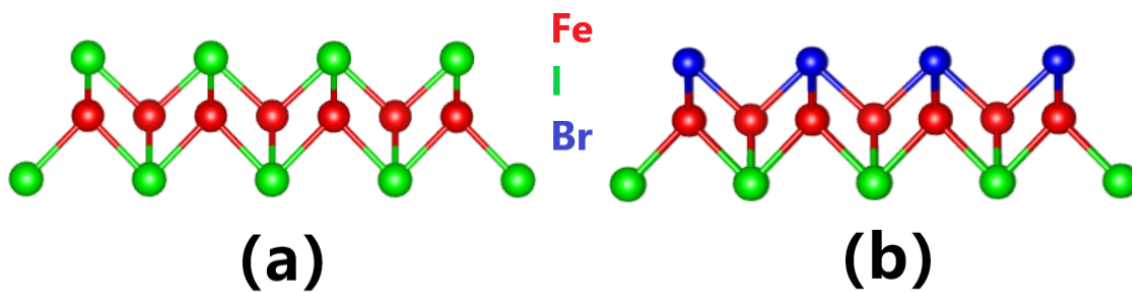

FIG. 1. (Color online) The side views of schematic crystal structures of  $\text{Fe}_2\text{I}_2$  (a) and  $\text{Fe}_2\text{IBr}$  (b).

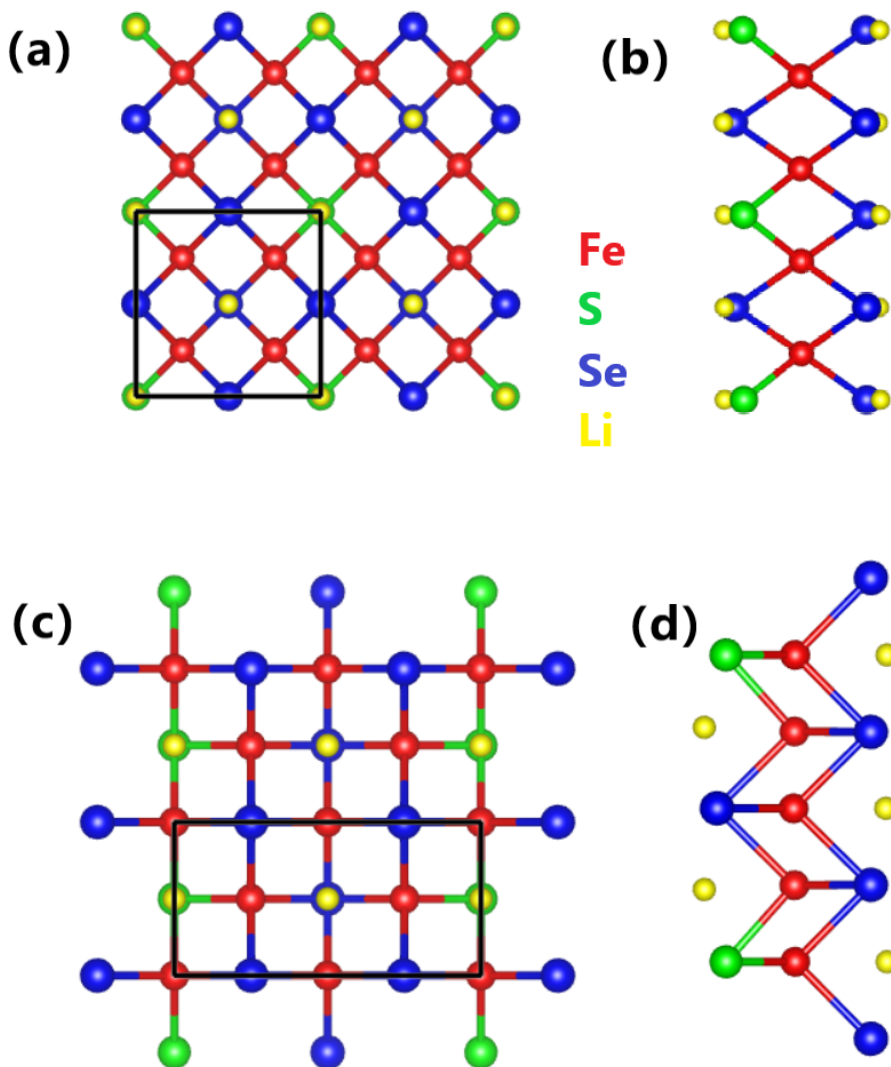

FIG. 2. (Color online) The top and side views of schematic crystal structures of  $\text{LiFeSe}_{0.75}\text{S}_{0.25}$  with  $\alpha$  (a,b) and  $\beta$  phases (c,d).

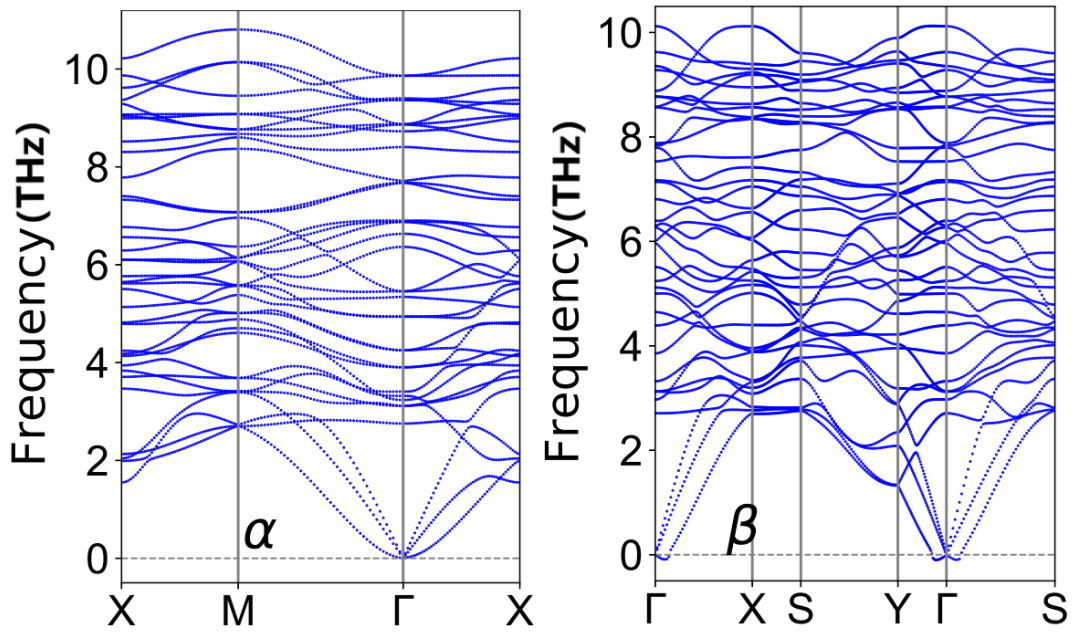

FIG. 3. (Color online) The phonon dispersions of monolayer  $\text{LiFeSe}_{0.75}\text{S}_{0.25}$  with  $\alpha$  and  $\beta$  phases.

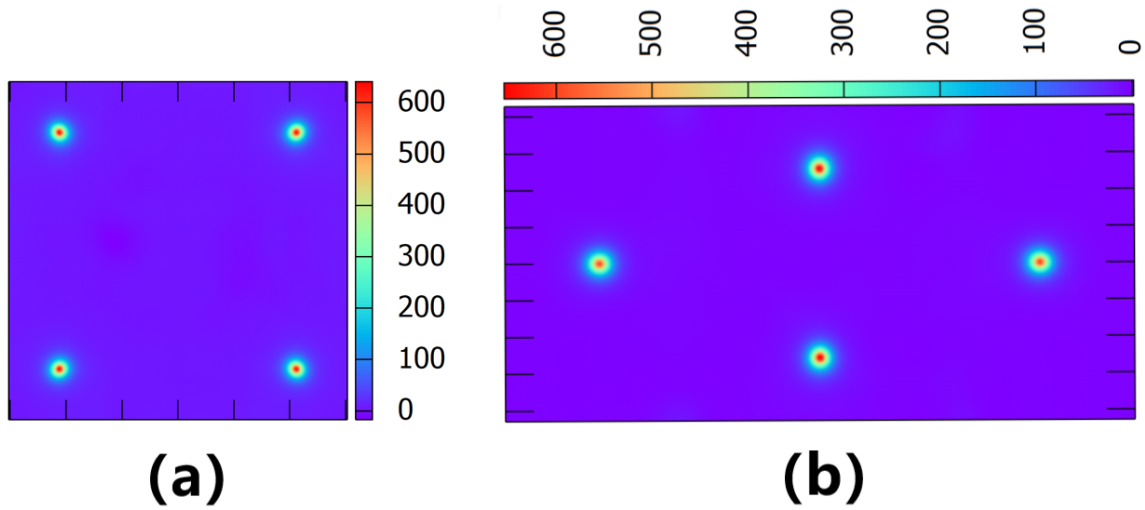

FIG. 4. (Color online) For monolayer  $\text{LiFeSe}_{0.75}\text{S}_{0.25}$  with  $\alpha$  (a) and  $\beta$  (b) phases, the distribution of Berry curvature contributed by occupied valence bands in the momentum space.

TABLE I. For monolayer  $\text{LiFeSe}_{0.75}\text{S}_{0.25}$  with  $\alpha$  and  $\beta$  phases, the lattice constants  $a_i$  in  $\text{\AA}$ , the elastic constants  $C_{ij}$  in  $\text{Nm}^{-1}$ , the piezoelectric strain coefficients  $d_{31}$  and  $d_{32}$  in  $\text{pm/V}$ , MAE in  $\mu\text{eV}/\text{Fe}$ , easy axis (EA), normalized exchange parameter  $J$  in  $\text{meV}$  and Curie temperature  $T_C$  in  $\text{K}$ .

| Name     | $a_1$ | $a_2$ | $C_{11}$ | $C_{22}$ | $C_{12}$ | $C_{66}$ | $d_{31}$ | $d_{32}$ | MAE | EA | $J$    | $T_C$ |
|----------|-------|-------|----------|----------|----------|----------|----------|----------|-----|----|--------|-------|
| $\alpha$ | 5.19  | 5.19  | 100.80   | 100.80   | 17.88    | 29.04    | -0.064   | -0.064   | 176 | c  | 129.54 | 950   |
| $\beta$  | 7.33  | 3.67  | 88.76    | 89.41    | 30.11    | 41.11    | -0.564   | -0.011   | 191 | c  | 131.81 | 966   |

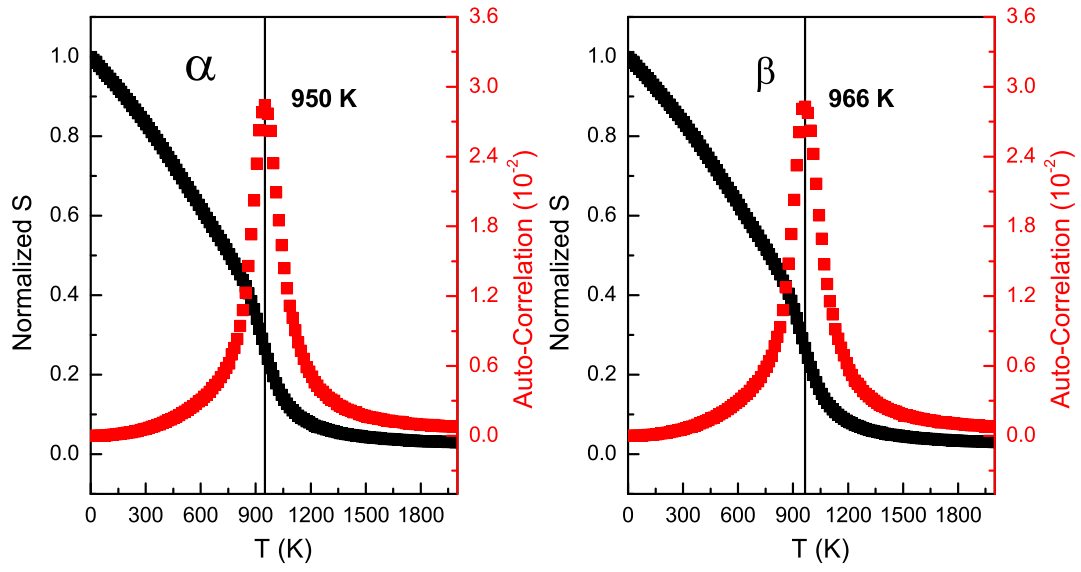

FIG. 5. (Color online) The normalized magnetic moment ( $S$ ) and auto-correlation of monolayer  $\text{LiFeSe}_{0.75}\text{S}_{0.25}$  with  $\alpha$  and  $\beta$  phases as a function of temperature.
